# Supplementary material
Source: PubMed Central journal article supplement (PMC5459578)
Supplement: NIHMS863113-supplement-SI.pdf [file NIHMS863113-supplement-SI.pdf]

Supporting information for CryoEM Structure Refinement by Integrating NMR Chemical Shifts  
with Molecular Dynamics Simulations

Juan R. Perilla<sup>1,\*†</sup>, Gongpu Zhao<sup>2,3, †‡</sup>, Manman Lu<sup>3,4</sup>, Jiying Ning<sup>2,3</sup>, Guangjin Hou<sup>3,4</sup>, In-Ja L.  
Byeon<sup>2,3</sup>, Angela M. Gronenborn<sup>2,3</sup>, Tatyana Polenova<sup>3,4</sup> and Peijun Zhang<sup>2,3,5,6,\*</sup>

<sup>1</sup>Department of Physics and Beckman Institute, University of Illinois at Urbana-Champaign,  
Urbana, IL 61801, USA

<sup>2</sup>Department of Structural Biology, University of Pittsburgh School of Medicine, Pittsburgh, PA  
15260, USA

<sup>3</sup>Pittsburgh Center for HIV Protein Interactions, University of Pittsburgh School of Medicine,  
Pittsburgh, PA 15260, USA

<sup>4</sup>Department of Chemistry and Biochemistry, University of Delaware, Newark, DE 19716, USA

<sup>5</sup>Division of Structural Biology, University of Oxford, The Henry Wellcome Building for  
Genomic Medicine, Headington, Oxford OX3 7BN, UK

<sup>6</sup>Electron Bio-Imaging Centre, Diamond Light Sources, Harwell Science and Innovation  
Campus, Didcot OX11 0DE, UK

†These authors contributed equally to this work

‡Current address: Van Andel Research Institute, 333 Bostwick Ave N.E., Grand Rapids, MI  
49503, USA

\*Correspondence: Telephone: +44 (0)1865287567; E-mail: [pez7@pitt.edu](mailto:pez7@pitt.edu) (P.Z.), Telephone : +1  
(217)-244-7403 ; E-mail: [jperilla@illinois.edu](mailto:jperilla@illinois.edu) (J.R.P.)

**Table S1.** Chemical shifts of CA NL4-3 A92E

| Res. | C $\delta$ | C $\alpha$ | C $\beta$ | C $\delta$ | C $\delta$ 1 | C $\delta$ 2 | C $\epsilon$ | C $\gamma$ | C $\gamma$ 1 | C $\gamma$ 2 | N      |
|------|------------|------------|-----------|------------|--------------|--------------|--------------|------------|--------------|--------------|--------|
| P1   |            | 62.45      | 33.20     | 50.41      |              |              |              | 24.80      |              |              |        |
| I2   | 174.95     | 61.95      | 38.36     |            |              |              |              |            | 28.24        | 17.41        | 121.32 |
| V3   |            | 59.03      | 36.12     |            |              |              |              |            | 21.43        | 18.68        | 122.17 |
| Q4   | 179.20     | 54.39      | 29.90     |            |              |              |              |            |              |              | 122.32 |
| N5   | 176.03     | 51.11      | 38.68     |            |              |              |              |            |              |              | 125.02 |
| L6   |            | 57.65      | 41.76     |            |              |              |              |            |              |              |        |
| Q7   | 178.17     | 59.99      | 28.04     |            |              |              |              | 33.60      |              |              | 117.39 |
| G8   | 176.10     | 47.24      |           |            |              |              |              |            |              |              | 110.39 |
| Q9   |            |            |           |            |              |              |              |            |              |              | 121.27 |
| M10  |            |            |           |            |              |              |              |            |              |              |        |
| V11  | 180.03     | 59.41      | 35.97     |            |              |              |              |            | 21.66        | 19.24        | 119.36 |
| H12  | 175.86     | 60.04      | 32.53     |            |              |              |              |            |              |              | 121.67 |
| Q13  |            | 54.07      | 32.29     |            |              |              |              | 33.18      |              |              | 125.76 |
| A14  | 175.41     | 51.76      | 18.77     |            |              |              |              |            |              |              | 125.08 |
| I15  | 175.35     | 62.21      | 38.90     |            | 14.91        |              |              |            | 28.43        | 17.40        | 122.70 |
| S16  | 174.44     | 56.49      | 63.47     |            |              |              |              |            |              |              | 123.84 |
| P17  | 178.14     | 65.56      | 31.96     | 50.46      |              |              |              | 28.02      |              |              | 137.23 |
| R18  | 179.56     | 59.63      | 30.18     | 43.59      |              |              |              | 27.74      |              |              | 116.25 |
| T19  | 175.59     | 66.94      | 68.14     |            |              |              |              |            |              | 23.42        | 120.05 |
| L20  | 178.22     | 58.02      | 41.06     |            | 25.14        |              |              | 26.57      |              |              | 121.93 |
| N21  | 178.29     | 56.09      | 38.54     |            |              |              |              |            |              |              | 115.49 |
| A22  | 180.20     | 54.98      | 18.47     |            |              |              |              |            |              |              | 122.11 |
| W23  | 175.46     | 58.42      | 29.98     |            |              | 127.67       |              | 111.88     |              |              | 119.92 |
| V24  | 175.93     | 66.01      | 31.20     |            |              |              |              |            | 24.01        | 22.33        | 118.12 |
| K25  | 178.17     | 60.16      | 32.18     | 29.47      |              |              | 41.90        | 25.12      |              |              | 117.94 |
| V26  | 177.60     | 65.97      | 31.01     |            |              |              |              |            | 23.94        | 22.17        | 119.47 |
| V27  | 178.17     | 65.63      | 30.70     |            |              |              |              |            | 22.21        |              | 120.12 |

|            |        |       |       |        |       |  |       |       |       |       |        |
|------------|--------|-------|-------|--------|-------|--|-------|-------|-------|-------|--------|
| <b>E28</b> | 176.64 | 59.09 | 29.48 | 183.36 |       |  |       | 37.27 |       |       | 119.77 |
| <b>E29</b> | 177.50 | 58.32 | 30.97 | 183.28 |       |  |       | 36.91 |       |       | 116.09 |
| <b>K30</b> | 176.38 | 55.80 | 33.18 | 27.15  |       |  | 42.01 |       |       |       | 115.60 |
| <b>A31</b> | 177.76 | 52.71 | 17.35 |        |       |  |       |       |       |       | 123.29 |
| <b>F32</b> | 175.81 | 58.34 | 38.21 |        |       |  |       |       |       |       | 114.13 |
| <b>S33</b> | 176.81 | 57.96 | 63.29 |        |       |  |       |       |       |       | 117.23 |
| <b>P34</b> | 178.35 | 66.41 | 31.68 | 50.85  |       |  |       | 28.16 |       |       |        |
| <b>E35</b> | 178.67 | 58.53 | 29.92 | 183.04 |       |  |       | 36.56 |       |       | 115.21 |
| <b>V36</b> | 178.73 | 66.70 | 31.84 |        |       |  |       |       | 22.71 | 21.85 | 116.81 |
| <b>I37</b> | 176.23 | 67.79 | 34.95 |        | 13.88 |  |       |       | 30.54 | 18.84 | 118.71 |
| <b>P38</b> |        | 65.10 | 30.61 | 49.06  |       |  |       | 28.24 |       |       |        |
| <b>M39</b> | 178.68 | 58.21 | 32.74 |        |       |  |       |       |       |       | 115.88 |
| <b>F40</b> | 179.64 | 61.76 | 38.07 |        |       |  |       |       |       |       | 120.42 |
| <b>S41</b> | 175.99 | 62.53 | 62.50 |        |       |  |       |       |       |       | 114.92 |
| <b>A42</b> | 180.86 | 54.22 | 19.20 |        |       |  |       |       |       |       | 122.18 |
| <b>L43</b> | 175.98 | 55.78 | 41.98 |        | 22.58 |  |       | 27.17 |       |       | 116.52 |
| <b>S44</b> | 174.84 | 57.46 | 63.81 |        |       |  |       |       |       |       | 109.89 |
| <b>E45</b> | 178.40 | 58.32 | 28.91 |        |       |  |       | 34.90 |       |       | 125.54 |
| <b>G46</b> | 174.67 | 45.54 |       |        |       |  |       |       |       |       | 115.94 |
| <b>A47</b> | 178.92 | 53.10 | 20.47 |        |       |  |       |       |       |       | 119.89 |
| <b>T48</b> | 174.54 | 60.16 | 69.73 |        |       |  |       |       |       | 22.34 | 108.88 |
| <b>P49</b> |        | 67.26 | 30.20 | 49.82  |       |  |       |       |       |       | 133.80 |
| <b>Q50</b> | 178.65 | 60.41 | 29.55 |        |       |  |       | 34.35 |       |       | 116.03 |
| <b>D51</b> | 177.84 | 57.75 | 41.21 |        |       |  |       |       |       |       | 119.38 |
| <b>L52</b> | 176.66 | 57.87 | 41.50 |        | 27.02 |  |       |       |       |       | 120.21 |
| <b>N53</b> | 178.44 | 56.98 | 38.42 |        |       |  |       |       |       |       | 118.17 |
| <b>T54</b> | 176.21 | 67.48 | 68.41 |        |       |  |       |       |       | 23.63 | 119.66 |
| <b>M55</b> | 179.47 | 60.44 | 32.98 |        |       |  |       |       |       |       | 119.79 |
| <b>L56</b> | 180.34 | 58.78 | 41.58 |        |       |  |       | 26.99 |       |       | 121.35 |
| <b>N57</b> | 175.89 | 55.77 | 37.66 |        |       |  |       |       |       |       | 116.89 |

|            |        |       |       |        |        |        |       |        |       |       |        |
|------------|--------|-------|-------|--------|--------|--------|-------|--------|-------|-------|--------|
| <b>T58</b> | 174.31 | 64.71 | 69.61 |        |        |        |       |        |       | 21.44 | 111.47 |
| <b>V59</b> | 176.57 | 62.33 | 33.09 |        |        |        |       |        | 21.47 |       | 121.28 |
| <b>G60</b> | 177.19 | 45.32 |       |        |        |        |       |        |       |       | 116.08 |
| <b>G61</b> | 174.93 | 47.20 |       |        |        |        |       |        |       |       | 106.27 |
| <b>H62</b> | 177.50 | 55.77 | 28.86 |        |        |        |       |        |       |       | 121.43 |
| <b>Q63</b> | 179.60 | 60.09 | 28.81 |        |        |        |       | 32.94  |       |       | 118.05 |
| <b>A64</b> | 178.44 | 54.50 | 18.13 |        |        |        |       |        |       |       | 121.83 |
| <b>A65</b> | 180.15 | 54.69 | 18.84 |        |        |        |       |        |       |       | 120.93 |
| <b>M66</b> | 178.58 | 56.23 | 28.95 |        |        |        |       | 31.79  |       |       | 112.98 |
| <b>Q67</b> | 178.78 | 58.29 | 27.32 | 181.52 |        |        |       | 32.67  |       |       | 120.41 |
| <b>M68</b> | 178.10 | 58.27 | 32.71 |        |        |        | 17.95 |        |       |       | 119.52 |
| <b>L69</b> | 179.53 | 58.90 | 41.85 |        |        |        |       | 27.21  |       |       | 122.71 |
| <b>K70</b> | 178.63 | 60.03 | 31.89 | 29.08  |        |        | 42.12 | 25.36  |       |       | 119.05 |
| <b>E71</b> | 178.22 | 59.97 | 29.70 | 182.95 |        |        |       | 36.81  |       |       | 118.69 |
| <b>T72</b> | 176.73 | 67.33 | 68.24 |        |        |        |       |        |       | 21.86 | 117.86 |
| <b>I73</b> | 176.92 | 66.10 | 38.01 |        | 14.77  |        |       |        | 29.76 | 18.32 | 122.42 |
| <b>N74</b> | 178.55 | 55.93 | 37.41 |        |        |        |       | 175.84 |       |       | 116.93 |
| <b>E75</b> | 179.60 | 59.28 | 29.37 | 183.52 |        |        |       | 35.94  |       |       | 122.09 |
| <b>E76</b> | 177.40 | 58.86 | 29.15 | 184.29 |        |        |       | 37.36  |       |       | 120.40 |
| <b>A77</b> | 179.32 | 54.65 | 17.81 |        |        |        |       |        |       |       | 123.91 |
| <b>A78</b> | 181.49 | 54.44 | 17.97 |        |        |        |       |        |       |       | 119.19 |
| <b>E79</b> | 178.27 | 58.57 | 28.58 | 183.86 |        |        |       | 34.84  |       |       | 121.34 |
| <b>W80</b> | 180.03 | 61.64 | 28.02 |        | 126.64 |        |       | 110.36 |       |       | 121.08 |
| <b>D81</b> | 178.49 | 57.28 | 39.99 |        |        |        |       |        |       |       | 119.84 |
| <b>R82</b> | 178.59 | 59.37 | 30.97 | 43.07  |        |        |       | 28.22  |       |       | 120.26 |
| <b>L83</b> |        | 55.34 | 42.77 |        |        |        |       | 25.48  |       |       | 116.76 |
| <b>H84</b> | 170.84 | 53.03 | 27.16 |        |        | 119.01 |       | 130.60 |       |       | 116.91 |
| <b>P85</b> |        | 63.01 | 32.12 | 50.42  |        |        |       | 27.49  |       |       | 137.03 |
| <b>V86</b> | 176.51 | 62.56 | 32.86 |        |        |        |       |        | 21.31 |       | 120.84 |
| <b>H87</b> | 175.75 | 55.64 | 29.19 |        |        |        |       |        |       |       | 124.52 |

|             |        |       |       |        |        |       |  |        |       |       |        |
|-------------|--------|-------|-------|--------|--------|-------|--|--------|-------|-------|--------|
| <b>A88</b>  | 177.93 | 52.23 | 19.20 |        |        |       |  |        |       |       | 127.79 |
| <b>G89</b>  | 171.61 | 44.41 |       |        |        |       |  |        |       |       | 109.42 |
| <b>P90</b>  | 176.73 | 62.69 | 32.29 | 49.58  |        |       |  | 27.10  |       |       | 133.03 |
| <b>I91</b>  | 175.15 | 60.19 | 38.41 |        | 15.31  |       |  |        | 28.45 | 18.03 | 122.45 |
| <b>E92</b>  |        | 54.61 | 29.42 |        |        |       |  |        |       |       | 128.20 |
| <b>P93</b>  | 177.10 | 64.31 | 31.79 | 50.60  |        |       |  | 27.60  |       |       |        |
| <b>G94</b>  | 174.35 | 45.48 |       |        |        |       |  |        |       |       | 112.45 |
| <b>Q95</b>  | 175.24 | 54.42 | 30.19 |        |        |       |  | 33.85  |       |       | 119.64 |
| <b>M96</b>  | 176.35 | 54.79 | 34.76 |        |        |       |  | 30.49  |       |       | 120.66 |
| <b>R97</b>  | 174.76 | 55.46 | 30.04 | 43.66  |        |       |  | 26.93  |       |       | 123.60 |
| <b>E98</b>  |        | 54.20 | 29.53 | 183.45 |        |       |  | 36.72  |       |       | 122.63 |
| <b>P99</b>  |        | 62.71 | 30.38 | 49.08  |        |       |  | 26.39  |       |       |        |
| <b>R100</b> | 178.64 | 52.75 | 30.82 |        |        |       |  | 26.06  |       |       | 121.48 |
| <b>G101</b> | 176.24 | 48.32 |       |        |        |       |  |        |       |       | 117.10 |
| <b>S102</b> | 176.97 | 60.85 | 61.95 |        |        |       |  |        |       |       | 114.78 |
| <b>D103</b> | 175.94 | 56.95 | 41.43 |        |        |       |  | 179.58 |       |       | 122.89 |
| <b>I104</b> | 172.67 | 65.73 | 36.85 |        | 11.02  |       |  |        | 30.62 | 17.09 | 125.88 |
| <b>A105</b> | 177.22 | 50.44 | 18.81 |        |        |       |  |        |       |       | 112.11 |
| <b>G106</b> | 173.84 | 45.33 |       |        |        |       |  |        |       |       | 102.08 |
| <b>T107</b> | 177.23 | 63.96 | 68.88 |        |        |       |  |        |       | 22.76 | 112.65 |
| <b>T108</b> | 173.18 | 61.01 | 69.29 |        |        |       |  |        |       | 20.34 | 106.05 |
| <b>S109</b> | 173.89 | 54.11 | 66.85 |        |        |       |  |        |       |       | 112.37 |
| <b>T110</b> | 175.80 | 59.48 | 71.23 |        |        |       |  |        |       | 22.04 | 112.40 |
| <b>L111</b> | 178.12 | 58.01 | 40.98 |        | 22.56  | 25.15 |  | 26.64  |       |       | 122.83 |
| <b>Q112</b> | 178.47 | 59.73 | 28.05 | 179.55 |        |       |  | 34.88  |       |       | 116.29 |
| <b>E113</b> | 178.42 | 58.88 | 29.00 | 184.14 |        |       |  | 37.35  |       |       | 120.73 |
| <b>Q114</b> | 177.90 | 60.37 | 28.24 | 179.62 |        |       |  | 32.92  |       |       | 117.71 |
| <b>I115</b> | 179.62 | 65.62 | 38.39 |        | 14.22  |       |  |        | 29.23 | 17.24 | 117.57 |
| <b>G116</b> | 176.08 | 47.35 |       |        |        |       |  |        |       |       | 111.60 |
| <b>W117</b> | 178.79 | 62.11 | 28.47 |        | 125.22 |       |  |        |       |       | 121.52 |

|             |        |       |       |       |       |       |       |        |       |       |        |
|-------------|--------|-------|-------|-------|-------|-------|-------|--------|-------|-------|--------|
| <b>M118</b> | 177.54 | 59.60 | 34.91 |       |       |       | 14.86 | 33.09  |       |       | 116.02 |
| <b>T119</b> | 173.54 | 61.12 | 70.05 |       |       |       |       |        |       | 21.92 | 104.64 |
| <b>H120</b> |        | 57.25 | 28.36 |       |       |       |       |        |       |       | 122.93 |
| <b>N121</b> |        | 48.90 | 39.58 |       |       |       |       | 177.59 |       |       | 120.11 |
| <b>P122</b> |        |       |       |       |       |       |       |        |       |       |        |
| <b>P123</b> | 177.83 | 63.53 | 31.99 | 50.73 |       |       |       | 28.09  |       |       |        |
| <b>I124</b> | 176.10 | 59.25 | 38.86 |       | 14.72 |       |       |        | 27.37 | 17.17 | 122.57 |
| <b>P125</b> | 176.74 | 63.07 | 29.13 | 51.22 |       |       |       | 27.50  |       |       |        |
| <b>V126</b> | 176.88 | 65.81 | 31.02 |       |       |       |       |        | 23.76 | 19.54 | 115.52 |
| <b>G127</b> | 174.83 | 47.19 |       |       |       |       |       |        |       |       | 106.97 |
| <b>E128</b> | 180.00 | 58.43 | 29.54 |       |       |       |       | 36.04  |       |       | 121.81 |
| <b>I129</b> | 176.20 | 65.27 | 38.29 |       | 15.06 |       |       |        | 28.47 | 18.27 | 121.53 |
| <b>Y130</b> | 176.06 | 56.26 | 36.44 |       |       |       |       |        |       |       | 117.18 |
| <b>K131</b> | 177.71 | 60.67 | 32.23 | 29.74 |       |       | 41.24 | 25.62  |       |       | 116.73 |
| <b>R132</b> | 178.26 | 60.15 | 29.89 | 44.21 |       |       |       | 28.44  |       |       | 117.71 |
| <b>W133</b> | 178.79 | 58.47 | 29.51 |       |       |       |       | 110.67 |       |       | 121.73 |
| <b>I134</b> | 178.28 | 65.13 | 38.03 |       | 14.87 |       |       |        | 29.85 | 17.83 | 119.23 |
| <b>I135</b> | 178.06 | 66.51 | 37.89 |       | 13.69 |       |       |        | 31.47 | 17.55 | 121.34 |
| <b>L136</b> | 181.69 | 58.91 | 41.61 |       |       |       |       | 27.23  |       |       | 121.56 |
| <b>G137</b> | 176.09 | 47.55 |       |       |       |       |       |        |       |       | 106.90 |
| <b>L138</b> | 178.64 | 58.15 | 42.25 |       | 24.98 | 22.72 |       | 26.33  |       |       | 123.23 |
| <b>N139</b> | 178.04 | 57.02 | 38.78 |       |       |       |       |        |       |       | 119.00 |
| <b>K140</b> | 178.63 | 60.17 | 32.11 | 29.81 |       |       | 42.03 | 25.21  |       |       | 118.33 |
| <b>I141</b> | 178.33 | 65.12 | 38.03 |       | 14.98 |       |       |        | 29.88 | 17.97 | 119.06 |
| <b>V142</b> | 177.40 | 65.62 | 32.29 |       |       |       |       |        | 21.87 |       | 119.21 |
| <b>R143</b> |        |       |       |       |       |       |       |        |       |       |        |
| <b>M144</b> | 177.61 | 57.88 | 32.80 |       |       |       |       | 30.24  |       |       | 119.09 |
| <b>Y145</b> | 177.88 | 59.69 | 38.03 |       |       |       |       |        |       |       | 117.45 |
| <b>S146</b> | 178.09 | 56.98 | 64.27 |       |       |       |       |        |       |       | 118.61 |
| <b>P147</b> |        | 63.34 | 32.65 | 51.83 |       |       |       | 28.71  |       |       |        |

|             |        |       |       |       |       |       |       |       |       |       |        |
|-------------|--------|-------|-------|-------|-------|-------|-------|-------|-------|-------|--------|
| <b>T148</b> | 172.68 | 61.71 | 70.64 |       |       |       |       |       |       | 21.10 | 111.49 |
| <b>S149</b> | 174.31 | 56.71 | 63.51 |       |       |       |       |       |       |       | 122.33 |
| <b>I150</b> | 175.25 | 60.83 | 39.53 |       | 15.57 |       |       |       | 28.81 | 18.38 | 128.54 |
| <b>L151</b> | 178.35 | 56.83 | 41.53 |       | 23.87 | 25.95 |       | 28.02 |       |       | 118.87 |
| <b>D152</b> | 175.83 | 54.15 | 42.04 |       |       |       |       |       |       |       | 115.06 |
| <b>I153</b> | 173.61 | 59.01 | 33.87 |       | 9.75  |       |       |       | 26.84 | 16.97 | 122.25 |
| <b>R154</b> | 175.43 | 54.33 | 33.16 | 43.25 |       |       |       | 27.24 |       |       | 125.69 |
| <b>Q155</b> | 177.01 | 56.08 | 27.30 |       |       |       |       | 32.51 |       |       | 127.96 |
| <b>G156</b> | 173.50 | 44.77 |       |       |       |       |       |       |       |       | 116.75 |
| <b>P157</b> | 177.28 | 65.68 | 32.13 | 50.26 |       |       |       | 27.69 |       |       |        |
| <b>K158</b> | 175.67 | 54.13 | 32.53 |       |       |       | 41.95 | 25.05 |       |       | 114.91 |
| <b>E159</b> | 174.56 | 53.60 | 32.36 |       |       |       |       | 35.03 |       |       | 125.88 |
| <b>P160</b> | 177.45 | 63.48 | 32.71 | 51.83 |       |       |       |       |       |       |        |
| <b>F161</b> | 177.14 | 62.62 | 39.42 |       |       |       |       |       |       |       | 127.93 |
| <b>R162</b> | 179.33 | 59.72 | 30.27 |       |       |       |       | 27.76 |       |       | 115.49 |
| <b>D163</b> | 178.89 | 57.39 | 39.86 |       |       |       |       |       |       |       | 120.07 |
| <b>Y164</b> | 176.29 | 59.71 | 38.15 |       |       |       |       |       |       |       | 124.04 |
| <b>V165</b> |        |       |       |       |       |       |       |       |       |       | 117.03 |
| <b>D166</b> |        |       |       |       |       |       |       |       |       |       |        |
| <b>R167</b> |        |       |       |       |       |       |       |       |       |       |        |
| <b>F168</b> | 177.11 | 62.60 | 39.39 |       |       |       |       |       |       |       | 123.63 |
| <b>Y169</b> | 179.29 | 63.58 | 38.13 |       |       |       |       |       |       |       | 115.10 |
| <b>K170</b> |        |       |       |       |       |       |       |       |       |       |        |
| <b>T171</b> | 176.21 | 66.63 | 68.89 |       |       |       |       |       |       | 21.49 | 115.93 |
| <b>L172</b> | 178.94 | 58.14 | 42.37 |       |       |       |       | 26.24 |       |       | 123.81 |
| <b>R173</b> | 179.57 | 59.33 | 30.29 |       |       |       |       |       |       |       | 116.15 |
| <b>A174</b> | 178.38 | 53.47 | 18.55 |       |       |       |       |       |       |       | 119.63 |
| <b>E175</b> | 179.07 | 57.38 | 29.88 |       |       |       |       |       |       |       | 120.09 |
| <b>Q176</b> | 179.14 | 54.46 | 27.40 |       |       |       |       |       |       |       | 124.81 |
| <b>A177</b> | 176.85 | 51.28 | 20.57 |       |       |       |       |       |       |       | 124.98 |

|             |        |       |       |       |       |       |  |       |       |       |        |
|-------------|--------|-------|-------|-------|-------|-------|--|-------|-------|-------|--------|
| <b>S178</b> | 177.76 | 57.46 | 64.92 |       |       |       |  |       |       |       | 116.45 |
| <b>Q179</b> | 177.79 | 58.56 | 28.61 |       |       |       |  |       |       |       | 121.64 |
| <b>E180</b> | 179.92 | 59.96 | 29.68 |       |       |       |  |       |       |       | 118.23 |
| <b>V181</b> | 178.02 | 66.67 | 31.04 |       |       |       |  |       | 23.95 | 20.59 | 121.41 |
| <b>K182</b> | 178.96 | 61.00 | 32.58 | 30.21 |       |       |  |       |       |       | 120.61 |
| <b>N183</b> | 175.78 | 57.02 | 37.87 |       |       |       |  |       |       |       | 117.67 |
| <b>W184</b> | 180.50 | 61.99 | 28.36 |       |       |       |  |       |       |       | 122.75 |
| <b>M185</b> | 178.77 | 59.59 | 31.00 |       |       |       |  |       |       |       | 120.21 |
| <b>T186</b> | 176.35 | 66.76 | 69.12 |       |       |       |  |       |       | 21.76 | 111.98 |
| <b>E187</b> | 178.98 | 60.19 | 29.52 |       |       |       |  |       |       |       | 118.90 |
| <b>T188</b> | 174.37 | 63.50 | 69.64 |       |       |       |  |       |       | 23.54 | 107.93 |
| <b>L189</b> | 178.63 | 58.32 | 42.29 |       |       |       |  |       |       |       | 120.99 |
| <b>L190</b> | 177.85 | 58.08 | 41.32 |       |       |       |  |       |       |       | 118.43 |
| <b>V191</b> | 177.13 | 65.58 | 32.04 |       |       |       |  |       | 21.74 |       | 115.63 |
| <b>Q192</b> | 177.18 | 58.47 | 28.41 |       |       |       |  |       |       |       | 115.37 |
| <b>N193</b> | 175.48 | 52.74 | 38.38 |       |       |       |  |       |       |       | 114.14 |
| <b>A194</b> |        | 51.60 | 18.96 |       |       |       |  |       |       |       | 124.86 |
| <b>N195</b> | 174.30 | 51.70 | 35.82 |       |       |       |  |       |       |       | 119.37 |
| <b>P196</b> | 178.55 | 66.83 | 32.52 | 50.12 |       |       |  | 28.46 |       |       |        |
| <b>D197</b> | 178.64 | 57.30 | 40.36 |       |       |       |  |       |       |       | 116.16 |
| <b>C198</b> | 176.01 | 62.37 | 27.89 |       |       |       |  |       |       |       |        |
| <b>K199</b> | 177.67 | 61.46 | 32.53 | 29.61 |       |       |  |       |       |       | 121.95 |
| <b>T200</b> | 176.19 | 66.54 | 68.82 |       |       |       |  |       |       | 21.77 | 112.17 |
| <b>I201</b> | 178.92 | 64.35 | 38.36 |       | 14.41 |       |  |       | 29.60 | 18.72 | 123.52 |
| <b>L202</b> | 178.48 | 57.19 | 41.79 |       | 25.73 | 23.22 |  | 27.54 |       |       | 119.06 |
| <b>K203</b> | 178.47 | 59.52 | 30.88 |       |       |       |  |       |       |       | 119.48 |
| <b>A204</b> | 178.98 | 53.30 | 18.49 |       |       |       |  |       |       |       | 120.10 |
| <b>L205</b> |        | 57.27 | 41.44 |       |       |       |  | 25.86 |       |       | 118.02 |
| <b>G206</b> | 172.77 | 44.54 |       |       |       |       |  |       |       |       | 104.48 |
| <b>P207</b> |        | 63.28 | 31.83 | 49.87 |       |       |  | 27.45 |       |       | 130.78 |



|             |        |       |       |  |  |  |  |       |  |       |        |
|-------------|--------|-------|-------|--|--|--|--|-------|--|-------|--------|
| <b>G208</b> |        | 45.59 |       |  |  |  |  |       |  |       | 110.07 |
| <b>A209</b> | 178.23 | 52.47 | 20.05 |  |  |  |  |       |  |       | 122.84 |
| <b>T210</b> | 175.24 | 60.24 | 70.64 |  |  |  |  |       |  | 22.23 | 113.91 |
| <b>L211</b> |        | 58.62 | 40.55 |  |  |  |  | 27.31 |  |       | 125.24 |
| <b>E212</b> |        |       |       |  |  |  |  |       |  |       |        |
| <b>E213</b> |        |       |       |  |  |  |  |       |  |       |        |
| <b>M214</b> |        | 59.31 | 32.77 |  |  |  |  |       |  |       |        |
| <b>M215</b> | 178.33 | 59.06 | 32.42 |  |  |  |  |       |  |       | 117.53 |
| <b>T216</b> | 176.47 | 66.62 | 68.88 |  |  |  |  |       |  | 21.76 | 115.69 |
| <b>A217</b> | 178.28 | 55.53 | 18.70 |  |  |  |  |       |  |       | 123.81 |
| <b>C218</b> | 179.03 | 60.27 | 28.55 |  |  |  |  |       |  |       | 110.91 |
| <b>Q219</b> |        |       |       |  |  |  |  |       |  |       | 121.66 |
| <b>G220</b> | 46.99  |       |       |  |  |  |  |       |  |       |        |
| <b>V221</b> |        |       |       |  |  |  |  |       |  |       |        |
| <b>G222</b> |        |       |       |  |  |  |  |       |  |       |        |
| <b>G223</b> |        |       |       |  |  |  |  |       |  |       |        |
| <b>P224</b> |        |       |       |  |  |  |  |       |  |       |        |
| <b>G225</b> |        |       |       |  |  |  |  |       |  |       |        |
| <b>H226</b> |        |       |       |  |  |  |  |       |  |       |        |
| <b>K227</b> |        |       |       |  |  |  |  |       |  |       |        |
| <b>A228</b> |        |       |       |  |  |  |  |       |  |       |        |
| <b>R229</b> |        |       |       |  |  |  |  |       |  |       |        |
| <b>V230</b> |        |       |       |  |  |  |  |       |  |       |        |
| <b>L231</b> |        |       |       |  |  |  |  |       |  |       |        |
